# Supplementary material for: An unusual two-strain cholera outbreak in Lebanon, 2022-2023: a genomic epidemiology study
Source: PubMed Central journal article supplement — Nat Commun. 2024 Aug 13;15:6963. doi: 10.1038/s41467-024-51428-0 (PMC11322537; doi:10.1038/s41467-024-51428-0), 2024-08-13
Supplement: 41467_2024_51428_MOESM2_ESM.pdf [file 41467_2024_51428_MOESM2_ESM.pdf]

# Description of Additional Supplementary Files

File Name: Supplementary Data 1

Description: Table containing isolates codes, metadata, antimicrobial susceptibility profiles, and genomic analysis of samples from this study.

File Name: Supplementary Data 2

Description: Table containing data of strains used in the phylogenetic tree of figure 3. Data includes: tree order, strain name, year of isolation, country of origin, short read accession number, and reference.

File Name: Supplementary Data 3

Description: Table containing Single Nucleotide Variations for the maximum likelihood (ML) phylogenetic tree (figure 3) that was constructed from an alignment of 10,647 chromosomal SNVs.
